# Supplementary material for: The Relationship between Social Support and Mental Health Problems of Peri- and Postmenopausal Women during the SARS-CoV-2 Pandemic
Source: MDPI journal article supplement (doi:10.3390/ijerph20032501), 2023-01-31
Supplement: s1 [file s1]

**Table S1. The level of depression according of BDI and climacterium symptoms according of BKMI of the respondents depending on socio demographic variables**

| Variables                    |                                        | BDI   |       | BKMI  |       |
|------------------------------|----------------------------------------|-------|-------|-------|-------|
|                              |                                        | M     | SD    | M     | SD    |
| <b>Marital status</b>        | Formal relationship (n=126)            | 8.86  | 8.28  | 17.6  | 11.34 |
|                              | Informal relationship (n=24)           | 9.96  | 8.45  | 15.33 | 10.62 |
|                              | Divorced (n=31)                        | 6.19  | 6.53  | 18    | 11.78 |
|                              | Single (n=17)                          | 10.65 | 10.76 | 10.94 | 8.21  |
|                              | Widowed (n=20)                         | 7.15  | 8.05  | 19.85 | 10.27 |
|                              | p*                                     | 0.304 |       | 0.099 |       |
| <b>Place of residence</b>    | Village (n=34)                         | 11.68 | 9.72  | 18.85 | 10.88 |
|                              | city with up to 10,000 people (n=15)   | 7.87  | 1     | 16.93 | 13.7  |
|                              | city with 10,000–100,000 people (n=40) | 8.32  | 8.47  | 18.05 | 10.78 |
|                              | city with over 100,000 people (n=129)  | 7.93  | 7.88  | 16.35 | 11.03 |
|                              | p*                                     | 0.141 |       | 0.553 |       |
| <b>Education</b>             | Basic [A] (n=11)                       | 13.27 | 10.18 | 14.64 | 11.29 |
|                              | Professional [B] (n=24)                | 7.12  | 6.84  | 18.58 | 12.25 |
|                              | Secondary [C] (n=65)                   | 6.52  | 6.54  | 16.89 | 10.59 |
|                              | Higher [D] (n=118)                     | 9.58  | 8.96  | 17.13 | 11.26 |
|                              | p*                                     | 0.063 |       | 0.855 |       |
| <b>Professionally active</b> | Yes (n=183)                            | 8.8   | 8.53  | 17.32 | 10.41 |
|                              | No (n=35)                              | 7.43  | 6.95  | 15.89 | 14.43 |
|                              | p&                                     | 0.473 |       | 0.228 |       |

M—mean; SD—standard deviation, p—significance level, \* Kruskal-Wallis test ^ & Mann-Whitney test, p—significance level BDI- Beck Depression Inventory; BKMI- The Blatt-Kupperman Index; p—significance level

**Table S2. The social support according of ISSB of the respondents depending on socio demographic variables**

| Variables                                                                                                                                                                   |                                        | ISSB              |       |                     |       |                      |       |                   |       |
|-----------------------------------------------------------------------------------------------------------------------------------------------------------------------------|----------------------------------------|-------------------|-------|---------------------|-------|----------------------|-------|-------------------|-------|
|                                                                                                                                                                             |                                        | emotional support |       | information support |       | instrumental support |       | appraisal support |       |
|                                                                                                                                                                             |                                        | M                 | SD    | M                   | SD    | M                    | SD    | M                 | SD    |
| Marital status                                                                                                                                                              | Formal relationship (n=126)            | 31.95             | 8.38  | 46.82               | 11.61 | 59.41                | 10.35 | 17.42             | 5.16  |
|                                                                                                                                                                             | Informal relationship (n=24)           | 31.33             | 7.85  | 44.17               | 11.47 | 57.67                | 11.33 | 16.58             | 5.5   |
|                                                                                                                                                                             | Divorced (n=31)                        | 30.94             | 7.83  | 45.35               | 12.08 | 55.55                | 12.39 | 17.52             | 4.63  |
|                                                                                                                                                                             | Single (n=17)                          | 35.53             | 6.78  | 48.94               | 10.97 | 59.24                | 12.12 | 17.82             | 5.55  |
|                                                                                                                                                                             | Widowed (n=20)                         | 33.3              | 8.34  | 49.95               | 10.34 | 61.35                | 9.48  | 18.1              | 5.39  |
|                                                                                                                                                                             | p*                                     | 0.311             |       | 0.304               |       | 0.236                |       | 0.865             |       |
| Place of residence                                                                                                                                                          | Village (n=34)                         | 31.91             | 9.09  | 46.29               | 12.38 | 57.35                | 13.2  | 17.26             | 6.25  |
|                                                                                                                                                                             | city with up to 10.000 people (n=15)   | 35.53             | 8.19  | 50.67               | 10.28 | 61.13                | 7.99  | 18.6              | 5.64  |
|                                                                                                                                                                             | city with 10.000–100.000 people (n=40) | 32.17             | 8.05  | 45.55               | 11.76 | 57.6                 | 11.37 | 17.6              | 5     |
|                                                                                                                                                                             | city with over 100.000 people (n=129)  | 31.8              | 7.9   | 46.82               | 11.35 | 59.34                | 10.31 | 17.29             | 4.85  |
|                                                                                                                                                                             | p*                                     | 0.505             |       | 0.418               |       | 0.843                |       | 0.812             |       |
|                                                                                                                                                                             | Education                              | Basic [A] (n=11)  | 34.09 | 11.24               | 47.36 | 14.17                | 54.09 | 18.69             | 18.09 |
| Professional [B] (n=24)                                                                                                                                                     |                                        | 33.21             | 6.73  | 46.54               | 10.02 | 59.42                | 9.08  | 17.17             | 4.82  |
| Secondary [C] (n=65)                                                                                                                                                        |                                        | 32.83             | 8.32  | 47.82               | 11.06 | 59.38                | 10.48 | 17.92             | 4.89  |
| Higher [D] (n=118)                                                                                                                                                          |                                        | 31.36             | 7.99  | 46.19               | 11.86 | 58.86±10.48          | 10.48 | 17.16             | 5.1   |
| p*                                                                                                                                                                          |                                        | 0.297             |       | 0.722               |       | 0.986                |       | 0.497             |       |
| Professionally active                                                                                                                                                       |                                        | Yes (n=183)       | 31.65 | 8.38                | 46.15 | 11.9                 | 58.14 | 11.39             | 17.07 |
|                                                                                                                                                                             | No (n=35)                              | 34.71             | 6.23  | 50.03               | 8.6   | 62.46                | 6.41  | 19.37             | 4.16  |
|                                                                                                                                                                             | p&                                     | 0.05              |       | 0.109               |       | 0.073                |       | 0.014             |       |
| M—mean; SD—standard deviation. p—significance level. * Kruskal-Wallis test ^ & Mann-Whitney test, p—significance level , ISSB- The Inventory of Social Supportive Behaviors |                                        |                   |       |                     |       |                      |       |                   |       |

**Table S3. The level of depression according of BDI and climacterium symptoms according of BKMI of the respondents depending on medical variables**

| Variables                |                              | BDI   |      | BKMI  |       |
|--------------------------|------------------------------|-------|------|-------|-------|
|                          |                              | M     | SD   | M     | SD    |
| <b>Menopausal status</b> | Perimenopasal women (n=98)   | 9.46  | 8.95 | 15.6± | 10.62 |
|                          | Postmenopausal women (n=120) | 7.87  | 7.68 | 18.3  | 11.42 |
|                          | p*                           | 0.264 |      | 0.077 |       |
| <b>Get over COVID-19</b> | Yes (n=90)                   | 9.9   | 9.02 | 18.94 | 11.82 |
|                          | No (n=128)                   | 7.66  | 7.65 | 15.79 | 10.45 |
|                          | p*                           | 0.08  |      | 0.069 |       |

M—mean; SD—standard deviation. p—significance level. Mann-Whitney test. BDI- Beck Depression Inventory; BKMI- The Blatt-Kupperman Index

**Table S4. The social support according of ISSB of the respondents depending on medical variables**

| Variables                |                              | ISSB              |      |                     |       |                      |       |                   |      |
|--------------------------|------------------------------|-------------------|------|---------------------|-------|----------------------|-------|-------------------|------|
|                          |                              | emotional support |      | information support |       | instrumental support |       | appraisal support |      |
|                          |                              | M                 | SD   | M                   | SD    | M                    | SD    | M                 | SD   |
| <b>Menopausal status</b> | Perimenopasal women (n=98)   | 31.67             | 7.56 | 45.63               | 11.24 | 57.86                | 11.97 | 16.74             | 5.09 |
|                          | Postmenopausal women (n=120) | 32.52             | 8.59 | 47.7                | 11.68 | 59.63                | 9.82  | 18                | 5.14 |
|                          | p*                           | 0.38              |      | 0.074               |       | 0.416                |       | 0.06              |      |
| <b>Get over COVID-19</b> | Yes (n=90)                   | 31.09             | 8.52 | 45.51               | 11.79 | 57.3                 | 11.83 | 16.74             | 5.49 |
|                          | No (n=128)                   | 32.88             | 7.81 | 47.66               | 11.26 | 59.91                | 10.01 | 16.74             | 5.49 |
|                          | p*                           | 0.102             |      | 0.138               |       | 0.151                |       | 0.115             |      |

M—mean; SD—standard deviation. p—significance level. \* Kruskal-Wallis test ^ & Mann-Whitney test, p—significance level, ISSB- The Inventory of Social Supportive Behaviors
